# Supplementary material for: Using Natural Language Processing Techniques to Provide Personalized Educational Materials for Chronic Disease Patients in China: Development and Assessment of a Knowledge-Based Health Recommender System
Source: PubMed Central journal article supplement (PMC7206519; doi:10.2196/17642), 2020-04-23
Supplement: medinform_v8i4e17642_app2.pdf [file medinform_v8i4e17642_app2.pdf]

## **Detailed outputs in the first 3 steps of CDPEO construction**

The first 3 steps of CDPEO construction are:

1. Determine the domain and scope of CDPEO
2. Consider reusing existing ontologies
3. Enumerate important terms in CDPEO

### **Detailed outputs in Step 1: List of Competency Questions:**

These questions can be divided into two types: general questions and specific questions.

General questions include:

- Why build this ontology?
- What are the domains this ontology will cover?
- Who are the intended users of the ontology?
- What will this ontology be used for?
- What is the intended output of this ontology?
- What will the ontology use to make decisions?
- What resources will be considered to build the ontology?

Specific questions include:

- What are the specific patient characteristics required to recommend educational materials?
- What is the relation between patient characteristics and document topics?
- What are the main components of the intended label set?
- How do you customize a patient vector according to a patient profile?

### **Detailed outputs in Step 2: Searching Result of Existing Ontologies:**

We searched for reusable existing ontologies on BioPortal

(<https://bioportal.bioontology.org/ontologies>) using keywords “hypertension”, “diabetes”, “chronic disease,” and “patient education”. A total of 9 ontologies were screened.

- Hypertension Ontology (HTN)

The Hypertension Ontology is a realism-based reference ontology for semantically managing clinical data about hypertension.

- EmpowerBP (EBP)

Clinical practice guidelines, behavior change theories, and associated behavior change strategies for the management of hypertension.

- Diabetes Mellitus Diagnosis Ontology (DDO)

An ontology for diagnosis of diabetes containing the diabetes related complications, symptoms, drugs, lab tests, etc.

➤ **Diabetes Mellitus Treatment Ontology (DMTO)**

DMTO is an OWL 2 ontology for creating customized treatment plans for diabetic patients.

➤ **HL7 FHIR & SSN ontology-based Type 1 Diabetes Mellitus Ontology (FASTO)**  
 FHIR And SSN based Type 1 diabetes Ontology (FASTO) is an OWL 2 ontology for real time management of insulin for diabetes patients especially type 1 diabetics.

➤ **BioMedBridges Diabetes Ontology (DIAB)**

A diabetes ontology.

➤ **Ontology of Glucose Metabolism Disorder (OGMD)**

Including the disease names, phenotypes and their classifications involved in Glucose Metabolism Disorder, Diabetes.

➤ **Chronic Kidney Disease Ontology (CKDO)**

The Chronic Kidney Disease Ontology was developed to assist routine data studies and case identification of CKD in primary care.

➤ **COPD Ontology (COPDO)**

The COPD Ontology is a biomedical ontology used for modelling concepts associated to chronic obstructive pulmonary disease in routine clinical databases.

**Detailed outputs in Step 3: List of Collected Terms:**

|                                |                              |
|--------------------------------|------------------------------|
| ➤ 患者 (Patients)                | ➤ 怀孕 (Pregnancy)             |
| ➤ 疾病 (Disease)                 | ➤ 男性 (Male)                  |
| ➤ 慢性疾病 (Chronic Disease)       | ➤ 女性 (Female)                |
| ➤ 高血压 (Hypertension)           | ➤ 老年 (Elderly)               |
| ➤ 糖尿病 (Diabetes)               | ➤ 青年 (Youth)                 |
| ➤ 慢阻肺 (COPD)                   | ➤ 超重 (Overweight)            |
| ➤ 冠心病 (Coronary Heart Disease) | ➤ 生活方式 (Disease)             |
| ➤ 高血脂 (Hyperlipidemia)         | ➤ 吸烟 (Smoking)               |
| ➤ 脑卒中 (Stroke)                 | ➤ 饮酒 (Drinking)              |
| ➤ 肾病 (Kidney Disease)          | ➤ 饮食 (Diet)                  |
| ➤ 皮肤病 (Skin Disease)           | ➤ 运动 (Exercise)              |
| ➤ 眼病 (Eye Disease)             | ➤ 心理 (Mentality)             |
| ➤ 肺病 (Lung Disease)            | ➤ 生理参数 (Physiological Index) |
| ➤ 肝病 (Liver Disease)           | ➤ 血压 (Blood Pressure)        |
| ➤ 胃病 (Stomach Disease)         | ➤ 血糖 (Blood Glucose)         |
| ➤ 人口学资料 (Demographic)          | ➤ 胆固醇 (Cholesterol)          |
| ➤ 年龄 (Age)                     | ➤ 甘油三酯 (Triglyceride)        |
| ➤ 性别 (Sex)                     | ➤ 高密度脂蛋白 (HDL)               |
| ➤ BMI                          | ➤ 低密度脂蛋白 (LDL)               |

|                               |                         |
|-------------------------------|-------------------------|
| ➤ 问卷调查 (Questionnaire)        | ➤ 尿酸 (Uric Acid)        |
| ➤ 实验室测试 (Lab test)            | ➤ 收缩压 (Systolic BP )    |
| ➤ 自我监测 (Self-monitoring)      | ➤ 舒张压 (Diastolic BP)    |
| ➤ 用药 (Medication)             | ➤ 每日吸烟 (Daily Smoking)  |
| ➤ 降压药 (Antihypertensive drug) | ➤ 每日饮酒 (Daily Drinking) |
| ➤ 降糖药 (Hypoglycemic drug)     | ➤ 并发症 (Complication)    |
| ➤ 降脂药 (Hypolipidemic drug )   | ➤ IPAQ                  |
| ➤ 胰岛素 (Insulin)               | ➤ PHQ-9                 |
