# Supplementary material for: Using Natural Language Processing Techniques to Provide Personalized Educational Materials for Chronic Disease Patients in China: Development and Assessment of a Knowledge-Based Health Recommender System
Source: PubMed Central journal article supplement (PMC7206519; doi:10.2196/17642), 2020-04-23
Supplement: medinform_v8i4e17642_app4.pdf [file medinform_v8i4e17642_app4.pdf]

Table S1. CDPEO ontology metrics

| Metric                          | Count |
|---------------------------------|-------|
| <b>Overall Metrics</b>          |       |
| Classes                         | 40    |
| Axioms                          | 799   |
| Logical Axioms                  | 630   |
| Declaration Axioms              | 169   |
| Object Properties               | 31    |
| Data Properties                 | 67    |
| Individuals                     | 32    |
| SWRL Rules                      | 80    |
| <b>Class Axioms</b>             |       |
| SubClassOf Axioms               | 64    |
| DisjointClasses Axioms          | 7     |
| <b>Object Property Axioms</b>   |       |
| SubObjectPropertyOf Axioms      | 30    |
| FunctionalObjectProperty Axioms | 30    |
| ObjectPropertyDomain Axioms     | 30    |
| ObjectPropertyRange Axioms      | 30    |
| <b>Data Property Axioms</b>     |       |
| SubDataPropertyOf Axioms        | 66    |
| FunctionalDataProperty Axioms   | 66    |
| DataPropertyDomain Axioms       | 66    |
| DataPropertyRange Axioms        | 66    |
| <b>Individual Axioms</b>        |       |
| ClassAssertion Axioms           | 32    |
| ObjectPropertyAssertion Axioms  | 30    |
| DataPropertyAssertion Axioms    | 33    |

Table S2. All SWRL Rules in CDPEO

| Category     | Rule Number | SWRL Rule                                                                                                                                                    | Corresponding Vector Item |
|--------------|-------------|--------------------------------------------------------------------------------------------------------------------------------------------------------------|---------------------------|
| Demographics | A01         | PatientProfile(?p) ^ hasGender(?p, ?g) ^<br>hasGenderValue(?g, "F") -><br>vectorItemFemale(?p, 1) ^<br>vectorItemMale(?p, 0)                                 | Female                    |
|              | A02         | PatientProfile(?p) ^ hasGender(?p, ?g) ^<br>hasGenderValue(?g, "M") -><br>vectorItemFemale(?p, 0) ^<br>vectorItemMale(?p, 1)                                 | Male                      |
|              | A03         | PatientProfile(?p) ^ hasAge(?p, ?a) ^<br>hasAgeValue(?a, ?v) ^<br>swrlb:greaterThanOrEqual(?v, 60) -><br>vectorItemYouth(?p, 0) ^<br>vectorItemOldAge(?p, 1) | Elderly                   |
|              | A04         | PatientProfile(?p) ^ hasAge(?p, ?a) ^<br>hasAgeValue(?a, ?v) ^<br>swrlb:lessThanOrEqual(?v, 60) -><br>vectorItemYouth(?p, 1) ^<br>vectorItemOldAge(?p, 0)    | Youth                     |
|              | A05         | PatientProfile(?p) ^ hasPregnancy(?p, ?pr)<br>^ hasPregnancyValue(?pr, true) -><br>vectorItemPregnant(?p, 1)                                                 | Pregnancy                 |
|              | A06         | PatientProfile(?p) ^ hasPregnancy(?p, ?pr)<br>^ hasPregnancyValue(?pr, false) -><br>vectorItemPregnant(?p, 0)                                                | Pregnancy                 |
|              | A07         | PatientProfile(?p) ^ hasBMI(?p, ?b) ^<br>hasBMIValue(?b, ?v) ^<br>swrlb:greaterThan(?v, 24) -><br>vectorItemOverWeight(?p, 1)                                | Overweight                |
|              | A08         | PatientProfile(?p) ^ hasBMI(?p, ?b) ^<br>hasBMIValue(?b, ?v) ^<br>swrlb:lessThanOrEqual(?v, 24) -><br>vectorItemOverWeight(?p, 0)                            | Overweight                |
| Disease      | B01         | PatientProfile(?p) ^<br>hasHypertension(?p, ?h) ^<br>hasHypertensionValue(?h, true) -><br>vectorItemHypertension(?p, 1)                                      | Hypertension              |
|              | B02         | PatientProfile(?p) ^<br>hasHypertension(?p, ?h) ^<br>hasHypertensionValue(?h, false) ->                                                                      | Hypertension              |

|            |  |                                                                                                                                 |                |
|------------|--|---------------------------------------------------------------------------------------------------------------------------------|----------------|
|            |  | vectorItemHypertension(?p, 0)                                                                                                   |                |
| <b>B03</b> |  | PatientProfile(?p) ^ hasCOPD(?p, ?c) ^<br>hasCOPDValue(?c, false) -><br>vectorItemChronicObstructivePulmonary<br>Disease(?p, 0) | COPD           |
| <b>B04</b> |  | PatientProfile(?p) ^ hasCOPD(?p, ?c) ^<br>hasCOPDValue(?c, true) -><br>vectorItemChronicObstructivePulmonary<br>Disease(?p, 1)  | COPD           |
| <b>B05</b> |  | PatientProfile(?p) ^ hasCHD(?p, ?c) ^<br>hasCHDValue(?c, true) -><br>vectorItemCoronaryHeartDisease(?p, 1)                      | CHD            |
| <b>B06</b> |  | PatientProfile(?p) ^ hasCHD(?p, ?c) ^<br>hasCHDValue(?c, false) -><br>vectorItemCoronaryHeartDisease(?p, 0)                     | CHD            |
| <b>B07</b> |  | PatientProfile(?p) ^ hasDiabetes(?p, ?d) ^<br>hasDiabetesValue(?d, false) -><br>vectorItemDiabetes(?p, 0)                       | Diabetes       |
| <b>B08</b> |  | PatientProfile(?p) ^ hasDiabetes(?p, ?d) ^<br>hasDiabetesValue(?d, true) -><br>vectorItemDiabetes(?p, 1)                        | Diabetes       |
| <b>B09</b> |  | PatientProfile(?p) ^<br>hasHyperlipidemia(?p, ?h) ^<br>hasHyperlipidemiaValue(?h, true) -><br>vectorItemHyperlipidemia(?p, 1)   | Hyperlipidemia |
| <b>B10</b> |  | PatientProfile(?p) ^<br>hasHyperlipidemia(?p, ?h) ^<br>hasHyperlipidemiaValue(?h, false) -><br>vectorItemHyperlipidemia(?p, 0)  | Hyperlipidemia |
| <b>B11</b> |  | PatientProfile(?p) ^ hasStroke(?p, ?s) ^<br>hasStrokeValue(?s, false) -><br>vectorItemStroke(?p, 0)                             | Stroke         |
| <b>B12</b> |  | PatientProfile(?p) ^ hasStroke(?p, ?s) ^<br>hasStrokeValue(?s, true) -><br>vectorItemStroke(?p, 1)                              | Stroke         |
| <b>B13</b> |  | PatientProfile(?p) ^ hasEyeDisease(?p, ?d)<br>^ hasEyeDiseaseValue(?d, false) -><br>vectorItemEyeDisease(?p, 0)                 | Eye Disease    |
| <b>B14</b> |  | PatientProfile(?p) ^ hasEyeDisease(?p, ?d)<br>^ hasEyeDiseaseValue(?d, true) -><br>vectorItemEyeDisease(?p, 1)                  | Eye Disease    |
| <b>B15</b> |  | PatientProfile(?p) ^<br>hasKidneyDisease(?p, ?d) ^<br>hasKidneyDiseaseValue(?d, true) ->                                        | Kidney Disease |

|                  |            |                                                                                                                                           |                 |
|------------------|------------|-------------------------------------------------------------------------------------------------------------------------------------------|-----------------|
|                  |            | vectorItemKidneyDisease(?p, 1)                                                                                                            |                 |
|                  | <b>B16</b> | PatientProfile(?p) ^<br>hasKidneyDisease(?p, ?d) ^<br>hasKidneyDiseaseValue(?d, false) -><br>vectorItemKidneyDisease(?p, 0)               | Kidney Disease  |
|                  | <b>B17</b> | PatientProfile(?p) ^<br>hasSkinDisease(?p, ?d) ^<br>hasSkinDiseaseValue(?d, false) -><br>vectorItemSkinDisease(?p, 0)                     | Skin Disease    |
|                  | <b>B18</b> | PatientProfile(?p) ^<br>hasSkinDisease(?p, ?d) ^<br>hasSkinDiseaseValue(?d, true) -><br>vectorItemSkinDisease(?p, 1)                      | Skin Disease    |
|                  | <b>B19</b> | PatientProfile(?p) ^<br>hasLungDisease(?p, ?d) ^<br>hasLungDiseaseValue(?d, true) -><br>vectorItemLungDisease(?p, 1)                      | Lung Disease    |
|                  | <b>B20</b> | PatientProfile(?p) ^<br>hasLungDisease(?p, ?d) ^<br>hasLungDiseaseValue(?d, false) -><br>vectorItemLungDisease(?p, 0)                     | Lung Disease    |
|                  | <b>B21</b> | PatientProfile(?p) ^<br>hasLiverDisease(?p, ?d) ^<br>hasLiverDiseaseValue(?d, false) -><br>vectorItemLiverDisease(?p, 0)                  | Liver Disease   |
|                  | <b>B22</b> | PatientProfile(?p) ^<br>hasLiverDisease(?p, ?d) ^<br>hasLiverDiseaseValue(?d, true) -><br>vectorItemLiverDisease(?p, 1)                   | Liver Disease   |
|                  | <b>B23</b> | PatientProfile(?p) ^<br>hasStomachDisease(?p, ?d) ^<br>hasStomachDiseaseValue(?d, true) -><br>vectorItemStomachDisease(?p, 1)             | Stomach Disease |
|                  | <b>B24</b> | PatientProfile(?p) ^<br>hasStomachDisease(?p, ?d) ^<br>hasStomachDiseaseValue(?d, false) -><br>vectorItemStomachDisease(?p, 0)            | Stomach Disease |
| <b>Lifestyle</b> | <b>C01</b> | PatientProfile(?p) ^ hasMentality(?p, ?m)<br>^ hasPHQ9Value(?m, ?v) ^<br>swrlb:lessThanOrEqualTo(?v, 4) -><br>vectorItemDepression(?p, 0) | Mentality       |
|                  | <b>C02</b> | PatientProfile(?p) ^ hasMentality(?p, ?m)<br>^ hasPHQ9Value(?m, ?v) ^<br>swrlb:lessThanOrEqualTo(?v, 9) ^                                 | Mentality       |

|  |            |                                                                                                                                                                                 |           |
|--|------------|---------------------------------------------------------------------------------------------------------------------------------------------------------------------------------|-----------|
|  |            | swrlb:greaterThanOrEqual(?v, 5) -><br>vectorItemDepression(?p, 1)                                                                                                               |           |
|  | <b>C03</b> | PatientProfile(?p) ^ hasMentality(?p, ?m)<br>^ hasPHQ9Value(?m, ?v) ^<br>swrlb:lessThanOrEqual(?v, 14) ^<br>swrlb:greaterThanOrEqual(?v, 10) -><br>vectorItemDepression(?p, 2)  | Mentality |
|  | <b>C04</b> | PatientProfile(?p) ^ hasMentality(?p, ?m)<br>^ hasPHQ9Value(?m, ?v) ^<br>swrlb:lessThanOrEqual(?v, 19) ^<br>swrlb:greaterThanOrEqual(?v, 15) -><br>vectorItemDepression(?p, 3)  | Mentality |
|  | <b>C05</b> | PatientProfile(?p) ^ hasMentality(?p, ?m)<br>^ hasPHQ9Value(?m, ?v) ^<br>swrlb:lessThanOrEqual(?v, 27) ^<br>swrlb:greaterThanOrEqual(?v, 20) -><br>vectorItemDepression(?p, 4)  | Mentality |
|  | <b>C06</b> | PatientProfile(?p) ^ hasSmoking(?p, ?s) ^<br>hasDailyCigarettes(?s, ?d) ^<br>swrlb:lessThanOrEqual(?d, 10) ^<br>swrlb:greaterThan(?d, 0) -><br>vectorItemSmoking(?p, 1)         | Smoking   |
|  | <b>C07</b> | PatientProfile(?p) ^ hasSmoking(?p, ?s) ^<br>hasDailyCigarettes(?s, ?d) ^<br>swrlb:lessThanOrEqual(?d, 20) ^<br>swrlb:greaterThanOrEqual(?d, 11) -><br>vectorItemSmoking(?p, 2) | Smoking   |
|  | <b>C08</b> | PatientProfile(?p) ^ hasSmoking(?p, ?s) ^<br>hasDailyCigarettes(?s, ?d) ^<br>swrlb:greaterThanOrEqual(?d, 21) -><br>vectorItemSmoking(?p, 3)                                    | Smoking   |
|  | <b>C09</b> | PatientProfile(?p) ^ hasSmoking(?p, ?s) ^<br>swrlb:equal(?d, 0) ^<br>hasDailyCigarettes(?s, ?d) -><br>vectorItemSmoking(?p, 0)                                                  | Smoking   |
|  | <b>C10</b> | PatientProfile(?p) ^ hasDrinking(?p, ?d) ^<br>hasDailyDrinking(?s, ?da) ^<br>swrlb:equal(?da, 0) -><br>vectorItemDrinking(?p, 0)                                                | Drinking  |
|  | <b>C11</b> | PatientProfile(?p) ^ hasDrinking(?p, ?d) ^<br>hasDailyDrinking(?s, ?da) ^<br>swrlb:greaterThan(?da, 0) ^<br>swrlb:lessThanOrEqual(?da, 1) -><br>vectorItemDrinking(?p, 1)       | Drinking  |

|                                |            |                                                                                                                                                                         |                |
|--------------------------------|------------|-------------------------------------------------------------------------------------------------------------------------------------------------------------------------|----------------|
|                                | <b>C12</b> | PatientProfile(?p) ^ hasDrinking(?p, ?d) ^<br>hasDailyDrinking(?s, ?da) ^<br>swrlb:lessThan(?da, 3) ^<br>swrlb:greaterThan(?da, 1) -><br>vectorItemDrinking(?p, 2)      | Drinking       |
|                                | <b>C13</b> | PatientProfile(?p) ^ hasDrinking(?p, ?d) ^<br>hasDailyDrinking(?s, ?da) ^<br>swrlb:greaterThanOrEqual(?da, 3) -><br>vectorItemDrinking(?p, 3)                           | Drinking       |
|                                | <b>C14</b> | PatientProfile(?p) ^ hasDiet(?p, ?d) ^<br>hasDietLevel(?d, "good") -><br>vectorItemDiet(?p, 0)                                                                          | Diet           |
|                                | <b>C15</b> | PatientProfile(?p) ^ hasDiet(?p, ?d) ^<br>hasDietLevel(?d, "medium") -><br>vectorItemDiet(?p, 1)                                                                        | Diet           |
|                                | <b>C16</b> | PatientProfile(?p) ^ hasDiet(?p, ?d) ^<br>hasDietLevel(?d, "poor") -><br>vectorItemDiet(?p, 2)                                                                          | Diet           |
|                                | <b>C17</b> | PatientProfile(?p) ^ hasExercise(?p, ?e) ^<br>hasIPAQLevel(?e, "high") -><br>vectorItemExercise(?p, 0)                                                                  | Exercise       |
|                                | <b>C18</b> | PatientProfile(?p) ^ hasExercise(?p, ?e) ^<br>hasIPAQLevel(?e, "moderate") -><br>vectorItemExercise(?p, 1)                                                              | Exercise       |
|                                | <b>C19</b> | PatientProfile(?p) ^ hasExercise(?p, ?e) ^<br>hasIPAQLevel(?e, "low") -><br>vectorItemExercise(?p, 2)                                                                   | Exercise       |
| <b>Physiological<br/>Index</b> | <b>D01</b> | PatientProfile(?p) ^ hasBP(?p, ?b) ^<br>hasSBPValue(?b, ?sv) ^<br>swrlb:greaterThanOrEqual(?sv, 180) -><br>vectorItemBloodPressure(?p, 3)                               | Blood Pressure |
|                                | <b>D02</b> | PatientProfile(?p) ^ hasBP(?p, ?b) ^<br>hasDBPValue(?b, ?dv) ^<br>swrlb:greaterThanOrEqual(?dv, 110) -><br>vectorItemBloodPressure(?p, 3)                               | Blood Pressure |
|                                | <b>D03</b> | PatientProfile(?p) ^ hasBP(?p, ?b) ^<br>hasDBPValue(?b, ?dv) ^<br>swrlb:greaterThanOrEqual(?dv, 100) ^<br>swrlb:lessThan(?dv, 110) -><br>vectorItemBloodPressure(?p, 2) | Blood Pressure |
|                                | <b>D04</b> | PatientProfile(?p) ^ hasBP(?p, ?b) ^<br>hasSBPValue(?b, ?sv) ^<br>swrlb:greaterThanOrEqual(?sv, 160) ^<br>swrlb:lessThan(?sv, 180) ->                                   | Blood Pressure |

|  |            |                                                                                                                                                                                                                  |                   |
|--|------------|------------------------------------------------------------------------------------------------------------------------------------------------------------------------------------------------------------------|-------------------|
|  |            | vectorItemBloodPressure(?p, 2)                                                                                                                                                                                   |                   |
|  | <b>D05</b> | PatientProfile(?p) ^ hasBP(?p, ?b) ^<br>hasDBPValue(?b, ?dv) ^<br>swrlb:greaterThanOrEqual(?dv, 100) ^<br>swrlb:lessThan(?dv, 110) -><br>vectorItemBloodPressure(?p, 2)                                          | Blood Pressure    |
|  | <b>D06</b> | PatientProfile(?p) ^ hasBP(?p, ?b) ^<br>hasDBPValue(?b, ?dv) ^<br>swrlb:greaterThanOrEqual(?dv, 90) ^<br>swrlb:lessThan(?dv, 100) -><br>vectorItemBloodPressure(?p, 1)                                           | Blood Pressure    |
|  | <b>D07</b> | PatientProfile(?p) ^ hasBP(?p, ?b) ^<br>hasDBPValue(?b, ?dv) ^<br>swrlb:lessThan(?dv, 90) ^<br>hasSBPValue(?b, ?sv) ^<br>swrlb:lessThan(?sv, 140) -><br>vectorItemBloodPressure(?p, 0)                           | Blood Pressure    |
|  | <b>D08</b> | PatientProfile(?p) ^ hasBG(?p, ?b) ^<br>hasBGValue(?b, ?v) ^ swrlb:lessThan(?v,<br>6.1) -> vectorItemBloodGlucose(?p, 0)                                                                                         | Blood Glucose     |
|  | <b>D09</b> | PatientProfile(?p) ^ hasBG(?p, ?b) ^<br>hasBGValue(?b, ?v) ^ swrlb:lessThan(?v,<br>7) ^ swrlb:greaterThanOrEqual(?v, 6.1) -><br>vectorItemBloodGlucose(?p, 1)                                                    | Blood Glucose     |
|  | <b>D10</b> | PatientProfile(?p) ^ hasBG(?p, ?b) ^<br>hasBGValue(?b, ?v) ^<br>swrlb:greaterThanOrEqual(?v, 7) -><br>vectorItemBloodGlucose(?p, 2)                                                                              | Blood Glucose     |
|  | <b>D11</b> | PatientProfile(?p) ^ hasLipoprotein(?p, ?l)<br>^ hasHDLValue(?l, ?h) ^<br>swrlb:lessThan(?h, 1.2) -><br>vectorItemLipoprotein(?p, 1)                                                                             | Lipoprotein       |
|  | <b>D12</b> | PatientProfile(?p) ^ hasLipoprotein(?p, ?l)<br>^ hasLDLValue(?l, ?lv) ^<br>swrlb:greaterThan(?lv, 3.12) -><br>vectorItemLipoprotein(?p, 1)                                                                       | Lipoprotein       |
|  | <b>D13</b> | PatientProfile(?p) ^ hasLipoprotein(?p, ?l)<br>^ hasLDLValue(?l, ?lv) ^<br>swrlb:lessThanOrEqual(?lv, 3.12) ^<br>hasHDLValue(?l, ?hv) ^<br>swrlb:greaterThanOrEqual(?hv, 1.2) -><br>vectorItemLipoprotein(?p, 0) | Lipoprotein       |
|  | <b>D14</b> | PatientProfile(?p) ^ hasTC(?p, ?t) ^<br>hasTCValue(?t, ?v) ^                                                                                                                                                     | Total Cholesterol |

|  |            |                                                                                                                                                                                                                                                                |                   |
|--|------------|----------------------------------------------------------------------------------------------------------------------------------------------------------------------------------------------------------------------------------------------------------------|-------------------|
|  |            | swrlb:lessThanOrEqual(?v, 5.2) -><br>vectorItemTotalCholesterol(?p, 0)                                                                                                                                                                                         |                   |
|  | <b>D15</b> | PatientProfile(?p) ^ hasTC(?p, ?t) ^<br>hasTCValue(?t, ?v) ^<br>swrlb:greaterThan(?v, 5.2) -><br>vectorItemTotalCholesterol(?p, 1)                                                                                                                             | Total Cholesterol |
|  | <b>D16</b> | PatientProfile(?p) ^ hasTG(?p, ?t) ^<br>hasTGValue(?t, ?v) ^<br>swrlb:greaterThan(?v, 1.7) -><br>vectorItemTriglyceride(?p, 1)                                                                                                                                 | Triglyceride      |
|  | <b>D17</b> | PatientProfile(?p) ^ hasTG(?p, ?t) ^<br>hasTGValue(?t, ?v) ^<br>swrlb:lessThanOrEqual(?v, 1.7) -><br>vectorItemTriglyceride(?p, 0)                                                                                                                             | Triglyceride      |
|  | <b>D18</b> | PatientProfile(?p) ^ hasUA(?p, ?u) ^<br>hasUAValue(?u, ?v) ^<br>swrlb:lessThanOrEqual(?v, 416) ^<br>hasAge(?p, ?a) ^ hasAgeValue(?a, ?av) ^<br>swrlb:lessThanOrEqual(?av, 60) ^<br>hasGender(?p, ?g) ^ hasGenderValue(?g,<br>"M") -> vectorItemUricAcid(?p, 0) | Uric Aid          |
|  | <b>D19</b> | PatientProfile(?p) ^ hasUA(?p, ?u) ^<br>hasUAValue(?u, ?v) ^<br>swrlb:lessThanOrEqual(?v, 357) ^<br>hasAge(?p, ?a) ^ hasAgeValue(?a, ?av) ^<br>swrlb:lessThanOrEqual(?av, 60) ^<br>hasGender(?p, ?g) ^ hasGenderValue(?g,<br>"F") -> vectorItemUricAcid(?p, 0) | Uric Aid          |
|  | <b>D20</b> | PatientProfile(?p) ^ hasUA(?p, ?u) ^<br>hasUAValue(?u, ?v) ^<br>swrlb:greaterThan(?v, 416) ^<br>hasAge(?p, ?a) ^ hasAgeValue(?a, ?av) ^<br>swrlb:lessThanOrEqual(?av, 60) ^<br>hasGender(?p, ?g) ^ hasGenderValue(?g,<br>"M") -> vectorItemUricAcid(?p, 1)     | Uric Aid          |
|  | <b>D21</b> | PatientProfile(?p) ^ hasUA(?p, ?u) ^<br>hasUAValue(?u, ?v) ^<br>swrlb:greaterThan(?v, 357) ^<br>hasAge(?p, ?a) ^ hasAgeValue(?a, ?av) ^<br>swrlb:lessThanOrEqual(?av, 60) ^<br>hasGender(?p, ?g) ^ hasGenderValue(?g,<br>"F") -> vectorItemUricAcid(?p, 1)     | Uric Aid          |
|  | <b>D22</b> | PatientProfile(?p) ^ hasUA(?p, ?u) ^<br>hasUAValue(?u, ?v) ^                                                                                                                                                                                                   | Uric Aid          |



|                   |            |                                                                                                                                                                                                                                                              |                               |
|-------------------|------------|--------------------------------------------------------------------------------------------------------------------------------------------------------------------------------------------------------------------------------------------------------------|-------------------------------|
|                   |            | swrlb:lessThanOrEqualTo(?v, 434) ^<br>hasAge(?p, ?a) ^ hasAgeValue(?a, ?av) ^<br>swrlb:greaterThan(?av, 60) ^<br>hasGender(?p, ?g) ^ hasGenderValue(?g,<br>"F") -> vectorItemUricAcid(?p, 0)                                                                 |                               |
|                   | <b>D23</b> | PatientProfile(?p) ^ hasUA(?p, ?u) ^<br>hasUAValue(?u, ?v) ^<br>swrlb:lessThanOrEqualTo(?v, 476) ^<br>hasAge(?p, ?a) ^ hasAgeValue(?a, ?av) ^<br>swrlb:greaterThan(?av, 60) ^<br>hasGender(?p, ?g) ^ hasGenderValue(?g,<br>"M") -> vectorItemUricAcid(?p, 0) | Uric Aid                      |
|                   | <b>D24</b> | PatientProfile(?p) ^ hasUA(?p, ?u) ^<br>hasUAValue(?u, ?v) ^<br>swrlb:greaterThan(?v, 476) ^<br>hasAge(?p, ?a) ^ hasAgeValue(?a, ?av) ^<br>swrlb:greaterThan(?av, 60) ^<br>hasGender(?p, ?g) ^ hasGenderValue(?g,<br>"M") -> vectorItemUricAcid(?p, 1)       | Uric Aid                      |
| <b>Medication</b> | <b>E01</b> | PatientProfile(?p) ^<br>hasAntiHypertensiveDrug(?p, ?d) ^<br>hasAntiHypertensiveDrugValue(?d, ?v) -><br>vectorItemAntiHypertensiveDrug(?p, ?v)                                                                                                               | Anti-<br>hypertensive<br>Drug |
|                   | <b>E02</b> | PatientProfile(?p) ^<br>hasHypoglycemicDrug(?p, ?d) ^<br>hasHypoglycemicDrugValue(?d, ?v) -><br>vectorItemHypoglycemicDrug(?p, ?v)                                                                                                                           | Hypoglycemic<br>Drug          |
|                   | <b>E03</b> | PatientProfile(?p) ^<br>hasHypolipidemicDrug(?p, ?d) ^<br>hasHypolipidemicDrugValue(?d, ?v) -><br>vectorItemHypolipidemicDrug(?p, ?v)                                                                                                                        | Hypolipidemic<br>Drug         |
|                   | <b>E04</b> | PatientProfile(?p) ^<br>hasHypoglycemicDrug(?p, ?d) ^<br>hasInsulinValue(?d, true) -><br>vectorItemInsulin(?p, 1)                                                                                                                                            | Insulin                       |
|                   | <b>E05</b> | PatientProfile(?p) ^<br>hasHypoglycemicDrug(?p, ?d) ^<br>hasInsulinValue(?d, false) -><br>vectorItemInsulin(?p, 0)                                                                                                                                           | Insulin                       |
